# Supplementary material
Source: ML conference proceedings conference paper supplement (https://proceedings.neurips.cc/paper_files/paper/2023/hash/9b35a0a20d617dc68ae98a7a57df2f51-Abstract.html)
Supplement: Supplementary file 1 [file 9b35a0a20d617dc68ae98a7a57df2f51-Supplemental-Conference.pdf]

---

# High-dimensional Contextual Bandit Problem without Sparsity

---

**Junpei Komiyama**  
New York University  
junpei@komiyama.info

**Masaaki Imaizumi**  
The University of Tokyo / RIKEN Center for AIP  
imaizumi@g.ecc.u-tokyo.ac.jp

## Abstract

In this research, we investigate the high-dimensional linear contextual bandit problem where the number of features  $p$  is greater than the budget  $T$ , or it may even be infinite. Differing from the majority of previous works in this field, we do not impose sparsity on the regression coefficients. Instead, we rely on recent findings on overparameterized models, which enables us to analyze the performance of the minimum-norm interpolating estimator when data distributions have small effective ranks. We propose an explore-then-commit (ETC) algorithm to address this problem and examine its performance. Through our analysis, we derive the optimal rate of the ETC algorithm in terms of  $T$  and show that this rate can be achieved by balancing exploration and exploitation. Moreover, we introduce an adaptive explore-then-commit (AETC) algorithm that adaptively finds the optimal balance. We assess the performance of the proposed algorithms through a series of simulations.

## 1 Introduction

The multi-armed bandit problem [Robbins, 1952, Lai and Robbins, 1985] has been widely studied in the field of sequential decision-making problems in uncertain environments, and it can be applied to a variety of real-world scenarios. This problem involves an agent selecting one of  $K$  arms in each round and receiving a corresponding reward. The agent aims to maximize the cumulative reward over rounds by using a clever algorithm that balances exploration and exploitation. In particular, a version of this problem called the contextual bandit problem [Abe and Long, 1999, Li et al., 2010] has attracted significant attention in the machine learning community. By observing the contexts associated with the arms, the agent can choose the best arm as a function of the contexts. This extension enables us to model many personalized machine learning scenarios, such as recommendation systems [Li et al., 2010, Wang et al., 2022] and online advertising [Tang et al., 2013], and personalized treatments [Chakraborty and Murphy, 2014].

Most of the papers about stochastic linear bandits assume that the number of features  $p$  is moderate [Li et al., 2010, Chu et al., 2011, Abbasi-Yadkori et al., 2011]. When  $p = o(\sqrt{T})$  to the number of rounds  $T$ , the model is identifiable, and the agent can choose the best arm for most rounds. However, recent machine learning models desire to utilize an even larger number of features, and the theory of bandit models under the identifiability assumption does not necessarily reflect the modern use of machine learning. Several recent papers have overcome this limitation by considering sparse linear bandit models [Wang et al., 2018, Kim and Paik, 2019, Bastani and Bayati, 2020, Hao et al., 2020, Oh et al., 2021, Li et al., 2022, Jang et al., 2022]. Sparse linear bandit models accept a very large number of features<sup>1</sup> and suppress most of the coefficients by introducing the  $\ell_1$  regularization.

---

<sup>1</sup>Typically, the number of feature  $p$  can be exponential to the number of datapoints  $T$ .

That said, the sparsity imposed by such models limits the applicability of these models. For example, in the case of recommendation models based on factorization, each user is associated with a dense latent vector [Rendle, 2010, Agarwal et al., 2012, Wang et al., 2022], which implies the sparsity is not unlikely the case. Another possible drawback of sparse models is that it requires the condition number to be close to one (e.g., the restricted isometry property, see Van De Geer and Bühlmann [2009] for review). This implies that the quality of the estimator is compromised by the noise on the features that correspond to small eigenvalues. Furthermore, it is still non-trivial to select a proper value of the penalty coefficient as a hyper-parameter. For example, Hara and Maehara [2017] claims that small changes in the choice of coefficients significantly alter feature selection, and Miolane and Montanari [2021] show a limitation of the conventional theory on the choice of penalty coefficients.

In this paper, We consider an alternative high-dimensional linear bandit problem without sparsity. We allow  $p$  to be as large as desired, and in fact, we even allow  $p$  to be infinitely large. Such an overparameterized model has more parameters than the number of training data points. A natural estimator in such a case is an *interpolating* estimator, which perfectly fits the training data. We adopt recent results that bound the error of the estimator in terms of the *effective rank* [Koltchinskii and Lounici, 2017, Bartlett et al., 2020] on the covariance of the features. When the eigenvalues of the covariance decay moderately fast, we can obtain a concentration inequality on the squared error of the estimator.

The contributions of this paper are as follows: First, We consider explore-then-commit (EtC) strategy for the stochastic bandit problem based on the minimum-norm interpolating estimator. We derive the optimal rate of exploration that minimizes regret. However, EtC requires model-dependent parameters on the covariance, which limits the practical utility. To address this limitation, we propose an adaptive explore-then-commit (AEtC) strategy, which adaptively estimates these parameters and achieves the optimal rate. We conduct simulations to verify the efficiency of the proposed method.

## 2 Preliminary

### 2.1 Notation

For  $z \in \mathbb{N}$ ,  $[z] := \{1, 2, \dots, z\}$ . For  $x \in \mathbb{R}$ , the notation  $\lfloor x \rfloor$  here denotes the largest integer that is less than or equal to a scalar  $x$ . For vectors  $X, X' \in \mathbb{R}^p$ ,  $\langle X, X' \rangle := X^\top X'$  is an inner product,  $\|X\|_2^2 := \langle X, X \rangle$  is an  $\ell_2$ -norm. For a positive-definite matrix  $A \in \mathbb{R}^p \times \mathbb{R}^p$ ,  $\|X\|_A^2 := \langle X, AX \rangle$  is a weighted  $\ell_2$ -norm.  $\|A\|_{\text{op}}$  denotes an operator norm of  $A$ .  $O(\cdot)$ ,  $o(\cdot)$ ,  $\Omega(\cdot)$ ,  $\omega(\cdot)$  and  $\Theta(\cdot)$  denotes Landau's Big-O, little-o, Big-Omega, little-omega, and Big-Theta notations, respectively.  $\tilde{O}(\cdot)$ ,  $\tilde{\Omega}(\cdot)$ , and  $\tilde{\Theta}(\cdot)$  are the notations that ignore polylogarithmic factors.

### 2.2 Problem Setup

This paper considers a linear contextual bandit problem with  $K$  arms. We consider the fully stochastic setting, where the contexts, as well as the rewards, are drawn from fixed distributions. For each round  $t \in [T]$  and arm  $i \in [K]$ , we define  $X^{(i)}(t)$  as a  $p$ -dimensional zero-mean sub-Gaussian vector. We assume  $X^{(i)}(t)$  is independent among rounds (i.e., vectors in two different rounds  $t, t'$  are independent) but allow vectors  $X^{(1)}(t), X^{(2)}(t), \dots, X^{(K)}(t)$  to be correlated with each other. The forecaster chooses an arm  $I(t) \in [K]$  based on the  $X^{(i)}(t)$  values of all the arms, and then observes a reward that follows a linear model as shown in

$$Y^{(I(t))}(t) = \langle X^{(I(t))}(t), \theta^{(I(t))} \rangle + \xi(t). \quad (1)$$

The unknown true parameters  $\theta^{(i)}$  for each arm  $i \in [K]$  lie in a parameter space  $\Theta \subset \mathbb{R}^p$ , and the independent noise term  $\xi(t)$  has zero mean and variance  $\sigma^2 > 0$ . We assume that  $\xi(t)$  is sub-Gaussian, and for the sake of simplicity, we assume that it does not depend on the choice of the arm. However, our results can be extended to the case where  $\xi(t)$  varies among arms. We assume that each  $\theta^{(i)}$  are bounded  $\|\theta^{(i)}\|_2 \leq \theta_{\max}$ . For each  $i \in [K]$ , we define a covariance matrix  $\Sigma^{(i)} = \mathbb{E}[X^{(i)}(t)X^{(i)}(t)^\top] \in \mathbb{R}^{p \times p}$ .

We define  $i^*(t) := \operatorname{argmax}_{i \in [K]} \langle X^{(i)}(t), \theta^{(i)} \rangle$  as the (ex ante) optimal arm at round  $t$ . Our goal is to design an algorithm that maximizes the total reward, which is equivalent to minimizing the following

expected regret [Lai and Robbins, 1985, Auer et al., 2002];

$$R(T) := \mathbb{E} \left[ \sum_{t=1}^T \left( \langle X^{(i^*(t))}(t), \theta^{(i^*(t))} \rangle - \langle X^{(I(t))}(t), \theta^{(I(t))} \rangle \right) \right], \quad (2)$$

where the expectation is taken with respect to the randomness of the contexts and (possibly) on the choice of arm  $I(t)$ .

### 2.3 Theory of Overparametrized Models

The primary focus of this paper is on scenarios where the number of arms  $K$  is moderate, but the number of features  $p$  is greater than the budget  $T$ , possibly to the point of being infinite. The efficiency of linear regression models in such scenarios depends significantly on the covariance matrix,  $\Sigma^{(i)}$ . Unlike sparsity, the theory of benign overfitting tightly examines errors using the decay of the eigenvalues of the covariance matrix of the context. In particular, if the decay rate of the eigenvalues is at a certain level, the error in linear regression converges to zero, even in high-dimensional spaces. To provide a more rigorous analysis of eigenvalue decay, the concept of *effective rank* is introduced in Section 2.4.

**Remark 1.** (Dependence on  $T$ ) In accordance with Bartlett et al. [2020], we permit the covariance matrix  $\Sigma^{(i)}$  to depend on  $T$ . In other words, we consider the sequence of covariances  $\Sigma^{(i)}(1), \Sigma^{(i)}(2), \dots$  for each  $T = 1, 2, \dots$ . The linear regression is consistent if the effective rank of  $\Sigma^{(i)}(T)$  grows sufficiently slow as a function of  $T$ .

### 2.4 Effective Ranks of Covariance Matrix

For a covariance matrix  $\Sigma^{(i)}$  for  $i \in [K]$  and  $k \in [p]$ , let  $\lambda_k^{(i)}$  be its  $k$ -th largest eigenvalue, such that  $\Sigma^{(i)} = \sum_{k=1}^p \lambda_k^{(i)} u_k^{(i)} (u_k^{(i)})^\top$  with order  $\lambda_1^{(i)} \geq \lambda_2^{(i)} \geq \dots \geq \lambda_p^{(i)}$  and eigenvectors  $u_k^{(i)}$ . We define the concept of *effective rank* as

$$r_k(\Sigma^{(i)}) := \frac{\sum_{j>k} \lambda_j^{(i)}}{\lambda_{k+1}^{(i)}}, \quad \text{and} \quad R_k(\Sigma^{(i)}) := \frac{(\sum_{j>k} \lambda_j^{(i)})^2}{\sum_{j>k} (\lambda_j^{(i)})^2}. \quad (3)$$

The first quantity  $r_k(\Sigma^{(i)})$  is related to the trace of  $\Sigma^{(i)}$ , and the second quantity  $R_k(\Sigma^{(i)})$  is related to the decay rate of the eigenvalues.

The effective rank is used as a measure of the intrinsic complexity of high-dimensional data, by rigorously capturing a decay rate of eigenvalues. If the covariance matrix  $\Sigma^{(i)}$  is an identity matrix of size  $p$ , then  $r_0(\Sigma^{(i)})$  and  $R_0(\Sigma^{(i)})$  are both equal to  $p$  (the rank of  $\Sigma^{(i)}$ ). However, we anticipate that these quantities will be less than  $p$ , which enables learning with fewer samples. In Figure 1, we plot of the effective rank in  $k$  with certain cases of eigenvalues  $\{\lambda_k\}_k$  of  $\Sigma$ . Even though  $\Sigma$  is full-rank, the effective rank  $R_k(\Sigma)$  is sublinear in  $k$ , which reflects the intrinsic low-complexity of data.

Because of this property, the effective ranks are used in modern high-dimensional statistics. Koltchinskii and Lounici [2017] evaluated concentration inequalities for high-dimensional random matrices using the notion. Bartlett et al. [2020], Tsigler and Bartlett [2020] evaluated the prediction error of a high-dimensional linear regression using the effective ranks and showed the consistency of the prediction.

## 3 Explore-then-Commit with Interpolation

The *Explore-then-Commit* (EtC) algorithm is a well-known approach for solving high-dimensional linear bandit problems, and it has been shown to be effective in previous studies such as Hao et al. [2020], Li et al. [2022]. The EtC algorithm operates by first conducting  $T_0 = NK < T$  rounds of exploration, during which it uniformly explores all available arms to construct an estimator  $\hat{\theta}^{(i)}$  for each arm  $i \in [K]$ . After the exploration phase, the algorithm proceeds with exploitation. Let  $N$  be the number of the draws of arm  $i$ , and  $\mathbf{X}^{(i)} = (X_1^{(i)}, \dots, X_N^{(i)})^\top \in \mathbb{R}^{N \times p}$  and  $\mathbf{Y}^{(i)} = (Y_1^{(i)}, \dots, Y_N^{(i)})^\top \in \mathbb{R}^N$

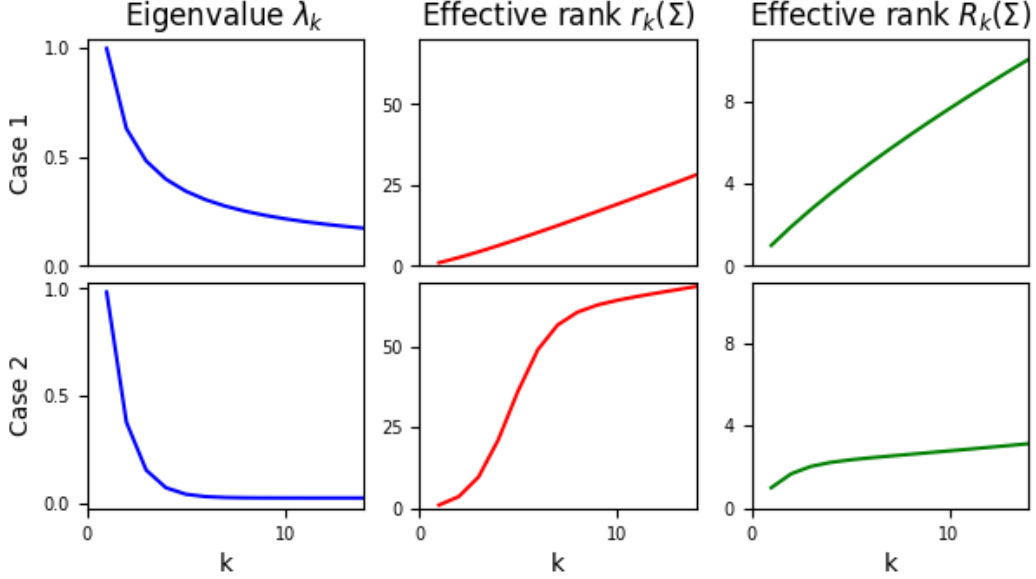

Figure 1: Eigenvalues  $\lambda_k$  (left), the effective rank  $r_k(\Sigma)$  (middle), and the effective rank  $R_k(\Sigma)$  (right) with  $k = 1, \dots, 15$  and  $T = 3$ ; Case 1:  $\lambda_k = Ck^{-1+1/T^{0.99}}$ , and Case 2:  $\lambda_k = C(\exp(-k) + T \exp(-T)/p)$ . Case 1 considers a decay that is slightly faster than  $k^{-1}$ , whereas Case 2 considers an exponentially fast decay. The slower increase of  $r_k(\Sigma)$  and  $R_k(\Sigma)$  in Case 2 reflects the impact of the eigenvalues' faster decay.

be the observed contexts and rewards of arm  $i$ , where  $(X_n^{(i)}, Y_n^{(i)})$  is the corresponding values on the  $n$ -th draw of arm  $i$ . Since we choose  $I(t)$  uniformly during the exploration phase, these are independent and identically drawn samples from the corresponding distribution.

For estimating the parameter  $\theta^{(i)}$ , we consider the minimum-norm *interpolating estimator* that perfectly fits the data, which reveals its advantage in recent results on high-dimensions [Bartlett et al., 2020]. Rigorously, we assume  $p > N$  and consider the following definition:

$$\tilde{\theta}^{(i)} := \operatorname{argmin} \left\{ \|\theta\|_2 \mid \theta \in \mathbb{R}^p, 0 = \sum_{(Y_n^{(i)}, X_n^{(i)}) : n \leq N} (Y_n^{(i)} - \langle \theta, X_n^{(i)} \rangle)^2 \right\}.$$

This estimator has a simple representation  $\tilde{\theta}^{(i)} = (\mathbf{X}^{(i)})^\top (\mathbf{X}^{(i)} (\mathbf{X}^{(i)})^\top)^{-1} \mathbf{Y}^{(i)}$ . The EtC algorithm is presented in Algorithm 1, which utilizes the aforementioned interpolating estimator. In the subsequent sections, we will first discuss the assumptions on the data-generating process, followed by an analysis of the accuracy of the estimator. We then present an upper bounds on the regret of the EtC algorithm.

## 4 Theory of Explore-then-Commit

This section analyzes the EtC algorithm. If we were to fix the number of samples, this theory would largely align with the existing literature [Bartlett et al., 2020, Tsigler and Bartlett, 2020]. However, the unique challenge in our case arises from the fact that the EtC selects the number of samples used to construct an estimator to balance between exploration and exploitation.

### 4.1 Assumption and Notion

We consider a spectral decomposition  $\Sigma^{(i)} = V^{(i)} \Lambda^{(i)} (V^{(i)})^\top$  with the matrices (operators)  $V^{(i)}$  and  $\Lambda^{(i)}$  for each arm  $i \in [K]$ , then impose the following assumptions.

**Assumption 1** (sub-Gaussianity). *For all  $t \in \mathbb{N}$  and  $i \in [K]$ , the followings hold:*

---

**Algorithm 1** Explore-then-Commit (EtC)

---

**Require:** Exploration duration  $T_0$ .

```
for  $t = 1, \dots, T_0$  do
  Observe  $X^{(i)}(t)$  for all  $i \in [K]$ .
  Choose  $I(t) = t - K \lfloor t/K \rfloor$ .
  Receive a reward  $Y^{(I(t))}(t)$ .
end for
for  $i \in [K]$  do
   $\hat{\theta}^{(i)} \leftarrow (\mathbf{X}^{(i)})^\top (\mathbf{X}^{(i)} (\mathbf{X}^{(i)})^\top)^{-1} \mathbf{Y}^{(i)}$ .
end for
for  $t = T_0 + 1, \dots, T$  do
  Observe  $X^{(i)}(t)$  for all  $i \in [K]$ .
  Choose  $I(t) = \operatorname{argmax}_{i \in [K]} \langle X^{(i)}(t), \hat{\theta}^{(i)} \rangle$ .
  Receive a reward  $Y^{(I(t))}(t)$ .
end for
```

---

- There exists a random vector  $Z^{(i)}(t)$  such that  $X^{(i)}(t) = V^{(i)}(\Lambda^{(i)})^{1/2} Z^{(i)}(t)$  which is independent elements and sub-Gaussian with a parameter  $\kappa_x^2 > 0$ , that is, for all  $\lambda \in \mathbb{R}^p$ , we have  $\mathbb{E}[\exp(\langle \lambda, Z^{(i)}(t) \rangle)] \leq \exp(\kappa_x^2 \|\lambda\|_2^2 / 2)$ .
- Moreover,  $\xi(t)$  is conditionally sub-Gaussian with a parameter  $\kappa_\xi^2 > 0$ , that is, for all  $\lambda \in \mathbb{R}$ , we have  $\mathbb{E}[\exp(\lambda \xi(t)) \mid X^{(i)}(t)] \leq \exp(\kappa_\xi^2 \lambda^2 / 2)$ .

The first bullet point of Assumption 1 requires that the features are multivariate sub-Gaussian and their tail is not too heavy, which is important for concentration inequalities on random variables [Vershynin, 2018]. The second bullet point of Assumption 1, which states that rewards involve sub-Gaussian noise, is a common assumption in contextual bandit problems.

## 4.2 Benign Covariance

We impose a condition to be benign on the covariance matrix  $\Sigma^{(i)}$  for all  $i \in [K]$ . The condition is described using the notion of effective/coherent rank, which is commonly applied to the study of benign overfitting [Bartlett et al., 2020, Tsigler and Bartlett, 2020]. However, unlike those papers that estimate using all  $T$  samples, we only use a portion of the data for learning.

We first define the *coherent rank* of  $\Sigma^{(i)}$  with a number of samples  $N$  as

$$k_N^* = k_N^*(\Sigma^{(i)}, N) := \min\{k \in \mathbb{N} \cup \{0\} \mid r_k(\Sigma^{(i)}) \geq N\},$$

where we define  $\min\{\emptyset\} = +\infty$ . By using the coherent rank, we decompose the error into two quantities called *effective bias/variance* denoted as  $B_{N,T}^{(i)}$  and  $V_{N,T}^{(i)}$ , based on a budget of  $T$  and the number of samples  $N$  used for estimation.

$$B_{N,T}^{(i)} := \lambda_{k_N^*}^{(i)}, \text{ and } V_{N,T}^{(i)} := \left( \frac{k_N^*}{N} + \frac{N}{R_{k_N^*}(\Sigma^{(i)})} \right). \quad (4)$$

**Definition 1** (Benign covariance). Under Assumption 1, a covariance matrix  $\Sigma^{(i)}$  is *benign*, if  $B_{N,T}^{(i)} = o(1)$  and  $V_{N,T}^{(i)} = o(1)$  hold as  $N, T \rightarrow \infty$  while  $N = \Theta(T)$ .

To put it differently, Assumption 1 and Definition 1 state that, if we can achieve consistent estimation by using all the data for estimation, then the covariance matrix is considered benign.

Technically, the benign property implies that eigenvalues decay fast enough compared with  $T$ . In particular, the following examples have been considered in the literature.

**Proposition 1** (Example of Benign Covariance, Theorem 31 in Bartlett et al. [2020]<sup>2</sup>). A covariance matrix  $\Sigma^{(i)}$  with eigenvalues  $\lambda_1^{(i)}, \lambda_2^{(i)}, \dots$  is benign if it satisfies one of the following.

---

<sup>2</sup>It should be noted that Bartlett et al. [2020] only provided the variance term. Later on, Tsigler and Bartlett [2020] described both the variance and bias terms, which we follow.

- **Example 1:** Let  $a \in (0, 1)$ ,  $p = \infty$  and  $\lambda_k^{(i)} = k^{-(1+1/T^a)}$ . In this case, we have  $B_{N,T}^{(i)} = O((T^a/N)^{1+1/T^a})$  and  $V_{N,T}^{(i)} = O(T^a/N + T^{-a})$ . For this model to be learnable,  $N \gg T^a$  is required, and the variance dominates the bias.
- **Example 2:** Let  $\lambda_k^{(i)} = k^{-b}$  and  $p = p_T = O(T^c)$  with  $b \in (0, 1)$  and  $c \in \left(\max\left(1, \frac{2}{2-b}, \frac{1}{1-b^2}\right), \frac{1}{1-b}\right)$ . In this case, we have  $B_{N,T}^{(i)} = O(T^{c(1-b)}/N)$  and  $V_{N,T}^{(i)} = O((N/T^c)^{\max(1, \frac{1-b}{b})})$ . For this model to be learnable,  $N \gg T^{c(1-b)}$  is required, and the bias dominates the variance.

The first example is when the decay rate is near  $k^{-1}$ , but the trace is  $O(T^a)$ . The second example is when the decay rate is smaller than  $k^{-1}$ , and the trace is  $O(T^{c(1-b)})$ . Note that [Bartlett et al. \[2020\]](#) provided two other examples of the benign covariance matrices.<sup>3</sup> Our analysis mainly focuses on the two examples in Proposition 1, but another example is also empirically tested in Section 6.

### 4.3 Estimation Error by Exploration

We evaluate an error in the estimator  $\widehat{\theta}^{(i)}$  by its prediction quality. That is, with a covariance matrix  $\Sigma^{(i)}$  and an identical copy  $X_*^{(i)}$  of  $X_1^{(i)}$ , we study

$$\|\theta^{(i)} - \widehat{\theta}^{(i)}\|_{\Sigma^{(i)}}^2 = \mathbb{E}_{X_*^{(i)}} \left[ (\langle \theta^{(i)}, X_*^{(i)} \rangle - \langle \widehat{\theta}^{(i)}, X_*^{(i)} \rangle)^2 \right],$$

The following result bounds the error of the estimator  $\widehat{\theta}^{(i)}$  in terms of bias and variance, which is a slight extension of [Tsigler and Bartlett \[2020\]](#). For  $k \in [p]$ , we define an empirical submatrix as  $\mathbf{X}_{k:\infty}^{(i)} \in \mathbb{R}^{N \times (p-k)}$  as the  $p-k$  columns to the right of  $\mathbf{X}^{(i)}$ , and define a Gram sub-matrix  $A_k^{(i)} = \mathbf{X}_{k:\infty}^{(i)} (\mathbf{X}_{k:\infty}^{(i)})^\top \in \mathbb{R}^{N \times N}$ .

**Theorem 2.** *Suppose Assumption 1. If there exists  $c_U > 1$  such that  $k_N^* < N/c_U$  and a condition number of  $A_k^{(i)}$  is positive with probability at least  $1 - c_U e^{-N/c_U}$ , then we have*

$$\|\widehat{\theta}^{(i)} - \theta^{(i)}\|_{\Sigma^{(i)}}^2 \leq C_U \left( B_{N,T}^{(i)} + V_{N,T}^{(i)} \right), \quad (5)$$

with some constant  $C_U > 0$  and probability at least  $1 - 2c_U e^{-N/c_U}$ .

Theorem 2 implies that the estimation error converges to zero if  $\Sigma^{(i)}$  has the benign property. The assumption on the condition number of  $A_k^{(i)}$  has a sufficient condition, which is provided in Lemma 3 in [Tsigler and Bartlett \[2020\]](#).

Moreover, the following lemma implies the tightness of the analysis in Theorem 2.

**Lemma 3** (Lower bound of estimation error, Theorem 10 in [Tsigler and Bartlett \[2020\]](#)). *Suppose Assumption 1. These exist some constants  $c_L, C_L > 0$  such that, with probability at least  $1 - c_L e^{-N/c_L}$ , we have*

$$\|\widehat{\theta}^{(i)} - \theta^{(i)}\|_{\Sigma^{(i)}}^2 \geq C_L \left( B_{N,T}^{(i)} + V_{N,T}^{(i)} \right). \quad (6)$$

In other words, the upper bound in Theorem 2 is optimal up to a constant.<sup>4</sup>

### 4.4 Regret Bound of Explore-then-Commit

This section analyzes the EtC algorithm. We introduce an error function  $E(N, T)$  that characterizes the rate of regret, which can be obtained by considering  $(B_{N,T}^{(i)} + V_{N,T}^{(i)})^{1/2}$ .

**Assumption 2.** (Error function<sup>5</sup>) *There exists a continuous function  $E : \mathbb{R}^2 \rightarrow \mathbb{R}^+$  that is decreasing in  $N$  such that  $\|\widehat{\theta}^{(i)} - \theta^{(i)}\|_{\Sigma^{(i)}} = \widetilde{\Theta}(E(N, T))$  as  $N, T \rightarrow \infty$ .*

<sup>3</sup>One of the omitted examples is the case where eigenvalues decay slightly slower than Example 1. The other example is the case where eigenvalues decay exponentially but has a noise term.

<sup>4</sup>Note that the constant here can depend on model parameters.

<sup>5</sup>The coherent rank  $k_N^*$  as well as  $B_{N,T}^{(i)}, V_{N,T}^{(i)}$  are discrete in  $N, T$ , and the error function  $E(N, T)$  is introduced to circumvent the issues related to this discreteness.

Assumption 2 is satisfied in Examples 1 and 2. In particular, for Example 1 in Proposition 1, the error function is given as  $E(N, T) = \sqrt{T^a/N + T^{-a}}$ , while for Example 2 in Proposition 1, it is given as  $E(N, T) = \sqrt{T^{c(1-b)}/N}$ .

**Theorem 4.** *Suppose Assumptions 1–2. Suppose that we run the EtC algorithm (Algorithm 1). Then, regret (2) satisfies*

$$R(T) = \widetilde{O}(L(T, K)),$$

as  $T \rightarrow \infty$  with some  $\alpha > 0$ . where  $L(T, K)$  is such that

$$N^* = \min_N \{N : N \geq T E(N/K, T)\}. \quad (7)$$

Specifically, for Example 1 in Proposition 1, we have  $L(T, K) = \max(T^{(2+a)/3} K^{2/3}, T^{1-a/2})$ , whereas for Example 2 in Proposition 1, we have  $L(T, K) = T^{(2+c(1-b))/3} K^{2/3}$ .

*Proof sketch of Theorem 4.* We show that the regret-per-round is  $O(1)$  during the exploration phase. Moreover, regret-per-round is  $\widetilde{O}(E(T_0/K, T))$  during the exploitation phase. The total regret is  $T_0 + \widetilde{O}(E(T_0/K, T))T$ , and optimizing  $T_0$  by using the decreasing property of  $E(N, T)$  in  $N$  yields the desired result.  $\square$

#### 4.5 Matching Lower Bound

We show that this choice of  $T_0$  as a function of  $T$  is indeed optimal.

**Theorem 5.** *Suppose Assumptions 1–2. Assume that we run the EtC algorithm (Algorithm 1). For any choice of  $T_0$ , the following event occurs with strictly positive probability as  $T \rightarrow \infty$ :*

$$R(T) = \widetilde{\Omega}(L(T, 3)).$$

*Proof sketch of Theorem 5.* We explicitly construct a model with  $K = 3$ . Let  $\epsilon_T = E(T_0/K, T)$ . In the model, the  $\Sigma^{(1)}, \Sigma^{(2)}, \Sigma^{(3)}$  are identical, and the only difference is that the first coefficients  $\theta_1^{(1)} = 1, \theta_1^{(2)} = \Theta(\epsilon_T), \theta_1^{(3)} = 0$ . All other coefficients are set to zero. Roughly speaking, the gap is

$$\left| \langle X^{(i)}(t), \widehat{\theta}^{(i)} \rangle - \langle X^{(j)}(t), \widehat{\theta}^{(j)} \rangle \right| = \begin{cases} \Theta(1) & (i = 1, j = 2, 3) \\ \Theta(\epsilon_T) & (i = 2, j = 3) \end{cases}.$$

The regret-per-round during the exploration phase is  $\Theta(1)$  due to a misidentification of the best arm between arm 1 and arms  $\{2, 3\}$ . The regret-per-round during the exploitation phase is  $\Theta(\epsilon_T)$  due to a misidentification of the best arm between arm 2 and arm 3.  $\square$

## 5 Adaptive Explore-then-Commit (AETC) Algorithm

In the prior section, we demonstrated that the optimal way to minimize EtC's regret is by selecting  $T_0$ , with  $T_0$  balancing the exploration and the exploitation. However, this requires knowledge of the covariance matrix's spectrum, which can be difficult to obtain in advance in certain scenarios. This section explores the way to adaptively determines the extent of exploration required.

### 5.1 Estimator

We assume that  $\Sigma^{(i)}$  follows the data-generating process of Example 1 or 2 in Proposition 1. We use  $\beta_T$  to denote that

$$\lambda_j^{(i)} = C_\lambda j^{-\beta_T}, \quad (8)$$

with some constant  $C_\lambda > 0$ . We have  $\beta_T = 1 + 1/T^a$  for Example 1, and  $\beta_T = b (< 1)$  for Example 2.

Balancing exploration and exploitation in an overparameterized model is challenging for the following reasons. First, the number of features  $p$  is very large or even infinite<sup>6</sup>. Second, the trace is heavy-tail

<sup>6</sup>Namely,  $p = \infty$  for for Proposition 1 (1) or  $p = T^c$  in for Proposition 1 (2).

because the decay is not very fast. As a result, a naive use of a traditional method does not work. We address this issue by utilizing two estimators. The first estimator is on the trace  $\text{tr}(\widehat{\Sigma}^{(i)})$  that we extracted from overparameterization theory [Bartlett et al., 2020], whereas the second estimator is on the estimated decay rate  $\widehat{\beta}_T$  that derives from Bosq [2000], Koltchinskii and Lounici [2017].

For an arm  $i \in [K]$  with  $N = T_0/K$  draws, we define an estimated eigenvalues  $\widehat{\lambda}_1^{(i)}, \dots, \widehat{\lambda}_N^{(i)} > 0$  from an empirical covariance matrix  $\widehat{\Sigma}^{(i)} := N^{-1} \sum_{j=1}^N X_j^{(i)}(t) X_j^{(i)}(t)^\top$ . We define the empirical trace to be  $\text{tr}(\widehat{\Sigma}^{(i)}) = \sum_j \widehat{\lambda}_j^{(i)}$ . The following lemma states the consistency of the estimated trace under very mild conditions.

**Lemma 6.** (Error bound of empirical trace) *Suppose Assumption 1. Suppose the data generating process (DGP) of Example 1 or Example 2 in Proposition 1. Then, for any  $C_{\text{poly}} > 0$ , with probability at least  $1 - 1/T^{C_{\text{poly}}}$ , we have the following as  $T \rightarrow \infty$ :*

$$\frac{|\text{tr}(\Sigma^{(i)}) - \text{tr}(\widehat{\Sigma}^{(i)})|}{\text{tr}(\Sigma^{(i)})} = \widetilde{O} \left( \frac{\sqrt{\sum_j (\lambda_j^{(i)})^2}}{\sum_j \lambda_j^{(i)}} \right) = o(1). \quad (9)$$

Moreover, the following bounds the estimation error of each eigenvalue.

**Lemma 7.** *Suppose Assumption 1. For any  $\delta \in (0, 1)$ , for any  $C_{\text{poly}} > 0$ , with probability at least  $1 - 1/T^{C_{\text{poly}}}$ , we have the following for any  $j = 1, \dots, p$  as  $T \rightarrow \infty$ :*

$$\left| \widehat{\lambda}_j^{(i)} - \lambda_j^{(i)} \right| = O \left( \sqrt{\frac{\text{tr}(\Sigma^{(i)})}{N}} \right). \quad (10)$$

Lemma 7 implies the estimator of each eigenvalue is  $o(1)$  if we choose  $N \gg \text{tr}(\Sigma^{(i)})$ . However, even if we choose a large  $N$ , the error is still non-negligible for the tail of eigenvalues where  $|\widehat{\lambda}_j^{(i)} - \lambda_j^{(i)}|$  is very small<sup>7</sup>. Consequently,  $\widehat{\lambda}_j^{(i)}$  for large  $j$  are not necessarily consistent, so as to the effective rank and the coherent rank estimated from them. To address this, we estimate the decay rate  $\beta_T$ , and then estimate the subsequent statistics.

Let the estimated decay rate be  $\widehat{\beta}_T = (1/\tau) \sum_{k=1}^{\tau} \log(\widehat{\lambda}_k/\widehat{\lambda}_{k+1})/\log((k+1)/k)$ . Theoretically,  $\widehat{\beta}_T$  is consistent for any constant  $\tau > 1$ . In practice, we can use a reasonable constant  $\tau$ , such as  $\tau = 10$ , for robustness. To estimate the effective ranks, we use the following form

$$\widetilde{\lambda}_k^{(i)} = \widehat{\lambda}_1^{(i)} k^{-\widehat{\beta}_T}.$$

Namely, we consider empirical analogues of the effective rank for  $k$  as

$$\widehat{r}_k(\Sigma^{(i)}) := \frac{\text{tr}(\widehat{\Sigma}^{(i)})}{\widetilde{\lambda}_{k+1}^{(i)}}, \text{ and } \widehat{R}_k(\Sigma^{(i)}) := \frac{(\text{tr}(\widehat{\Sigma}^{(i)}))^2}{\sum_{j>k} (\widetilde{\lambda}_j^{(i)})^2}.$$

We also define an estimator for the coherent rank as  $\widehat{k}_N := \min\{k \in \mathbb{N} \cup \{0\} \mid \widehat{r}_k(\Sigma^{(i)}) \geq N\}$ . Further, we define estimators of  $B_{N,T}^{(i)}, V_{N,T}^{(i)}$  of Eq. (4) as

$$\widehat{B}_{N,T}^{(i)} := \widetilde{\lambda}_{\widehat{k}_N}^{(i)}, \text{ and } \widehat{V}_{N,T}^{(i)} := \left( \frac{\widehat{k}_N}{N} + \frac{N}{\widehat{R}_{\widehat{k}_N}(\Sigma^{(i)})} \right),$$

Note that the estimators  $\widehat{r}_k$  and  $\widehat{R}_k$  use the trace  $\text{tr}(\widehat{\Sigma}^{(i)})$ , which is a sum of eigenvalues, instead of the partial sum of the eigenvalues that constitutes the effective rank of Eq. (3). Despite this change, this does not affect<sup>8</sup> asymptotic consistency of the coherent rank estimator  $\widehat{k}_N$ .

The following lemma states that small  $\tau$  suffices to assure the quality of  $\widehat{\beta}^{(i)}$ . We study a convergence rate of  $\widehat{\beta}^{(i)}$  and the other estimators as follows.

<sup>7</sup>Remember that we consider  $\Sigma^{(i)} = \Sigma^{(i)}(T)$  that depends on  $T$ . Tail of eigenvalues are  $o(1)$  to  $T$  as well.

<sup>8</sup>This is because  $\sum_j j^{-\beta_T}$  with  $\beta_T < 1$  or  $\beta_T \approx 1$  is tail-heavy.



---

**Algorithm 2** Adaptive Explore-then-Commit (AEtC)

---

```
while  $t = 1, 2, 3, \dots$  do
  Observe  $X^{(i)}(t)$  for all  $i \in [K]$ .
  Choose  $I(t) = t - K \lfloor t/K \rfloor$ .
  Receive a reward  $Y^{(I(t))}(t)$ .
  if  $t \in \{\lfloor e^N \mid N \in \mathbb{N}, N \geq \log T\}$  then
    if  $\text{Stop}(t/K)$  then
       $T_0 \leftarrow t$ .
      Break.
    end if
  end if
end while
for  $i \in [K]$  do
   $\hat{\theta}^{(i)} \leftarrow (\mathbf{X}^{(i)})^\top (\mathbf{X}^{(i)} (\mathbf{X}^{(i)})^\top)^{-1} \mathbf{Y}^{(i)}$ .
end for
for  $t = T_0 + 1, \dots, T$  do
  Observe  $X^{(i)}(t)$  for all  $i \in [K]$ .
  Choose  $I(t) = \operatorname{argmax}_{i \in [K]} \langle X^{(i)}(t), \hat{\theta}^{(i)} \rangle$ .
  Receive a reward  $Y^{(I(t))}(t)$ .
end for
```

---

**Lemma 8.** *Suppose Assumption 1. Suppose DGP of Example 1 or Example 2 in Proposition 1.<sup>9</sup> Assume that we choose  $N = N(T)$  such that  $\operatorname{tr}(\widehat{\Sigma}^{(i)})/N = o(1)$  for all  $i$ . Then, for any  $C_{\text{poly}} > 0$ , with probability at least  $1 - 1/T^{C_{\text{poly}}}$ , we have*

$$\frac{|\widetilde{\lambda}_k^{(i)} - \lambda_k^{(i)}|}{\lambda_k^{(i)}} = o(1),$$

as  $T \rightarrow \infty$  for all  $k \in [\tau]$ . Moreover, it implies  $|\beta_T - \widehat{\beta}_T| = o(1)$  and

$$\max \left\{ \frac{\widehat{B}_{N,T}^{(i)}}{B_{N,T}^{(i)}}, \frac{\widehat{V}_{N,T}^{(i)}}{V_{N,T}^{(i)}} \right\} = T^{o(1)}. \quad (11)$$

Eq. (11) states that the estimated rate of error is accurate as  $T \rightarrow \infty$ . To see this, for Example 1 in Proposition 1, the estimated error rate is  $T^{o(1)}(\sqrt{T^a/N + T^{-a}})$ , whose exponent approaches to  $\sqrt{T^a/N + T^{-a}}$  as  $T \rightarrow \infty$ .

## 5.2 Adaptive Explore-then-Commit (AEtC)

The Adaptive Explore-then-Commit (AEtC) algorithm is described in Algorithm 2. Unlike EtC, the amount of exploration in AEtC is adaptively determined based on the stopping condition:

$$\text{Stop}^{(i)}(N) = \left\{ N > C_T \operatorname{tr}(\widehat{\Sigma}^{(i)}) \cap NK \geq T \sqrt{\widehat{B}_{N,T}^{(i)} + \widehat{V}_{N,T}^{(i)}} \right\},$$

and  $\text{Stop} = \bigcap_{i \in [K]} \text{Stop}^{(i)}$ , where  $C_T = C_T(T)$  is a function of  $T$  that slowly diverges to  $+\infty$ . The first condition  $N > C_T \operatorname{tr}(\widehat{\Sigma}^{(i)})$  ensures that  $N$  is large enough to have consistency on the estimators, whereas the second condition  $NK \geq T \sqrt{\widehat{B}_{N,T}^{(i)} + \widehat{V}_{N,T}^{(i)}}$  balances the exploration and exploitation. The following theorem bounds the regret of AEtC.

**Theorem 9.** *Suppose Assumption 1. Suppose DGP of Example 1 or Example 2 in Proposition 1. Then, for any  $c > 0$ , the regret (2) when we run the AEtC algorithm (Algorithm 2) with a sufficiently slowly diverging  $C_T$  is bounded as follows as  $T \rightarrow \infty$ :*

$$R(T) = \widetilde{O}(L(T, K)T^c),$$

where  $L(T, K)$  is the function defined in Theorem 4.

<sup>9</sup>Note that DGP of Example 1 or 2 implies the existence of the error function of Assumption 2.

Theorem 9 states that, we can choose arbitrarily small  $c > 0$  and the exponent of the regret of AEtC approaches that of EtC (Theorem 4). Note that the condition  $N \geq C_T \text{tr}(\widehat{\Sigma}^{(i)})$  should not dominate the balance between exploration and exploitation: For example,  $C_T = C \log T$  for any  $C > 0$  suffices. In practice, a constant  $C_T$  works.

*Proof sketch of Theorem 9.* We can derive that Eqs. (9), (10), and (11) for all  $N \in [T]$  that hold with probability at least  $1 - O(1/T)$  by setting  $C_{\text{poly}} = 2$  and taking a union bound over  $N$ , and thus

$$\bigcap_{i \in [K]} \bigcap_{N \geq C_T \text{tr}(\widehat{\Sigma}^{(i)})} \left\{ \log \left( \frac{\sqrt{\widehat{B}_{N,T}^{(i)} + \widehat{V}_{N,T}^{(i)}}}{\sqrt{B_{N,T}^{(i)} + V_{N,T}^{(i)}}} \right) = \log(T^{o(1)}) \right\} \quad (12)$$

holds. Under this event, the stopping time of AEtC and EtC are at most  $T^{o(1)}$  times different. Given this, the proof of the theorem is easily modified from the proof of Theorem 4.  $\square$

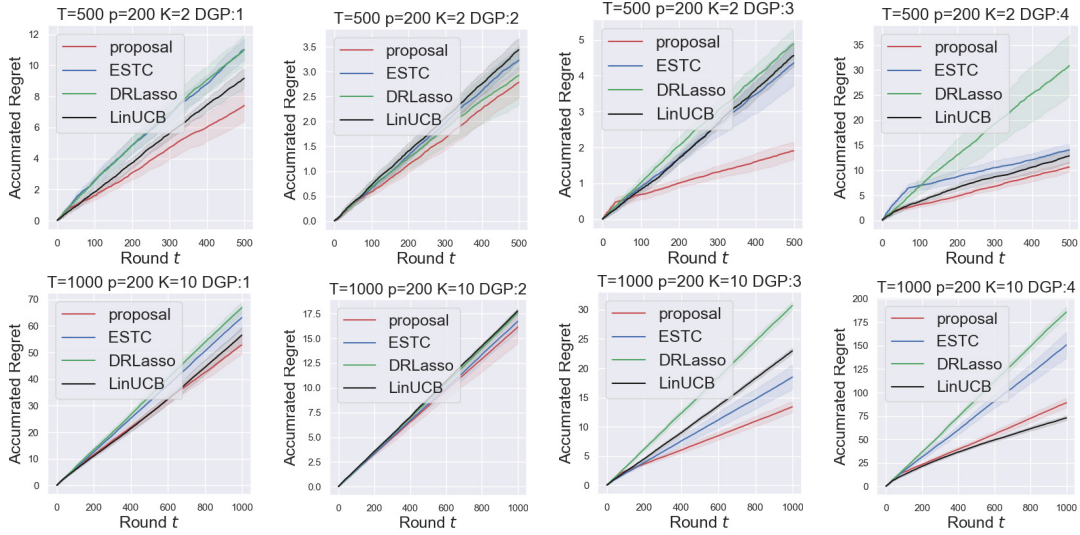

Figure 2: Comparison of methods on four DGPs. Smaller regret indicates better performance. The solid lines are the mean of 10 repetitions and the bands represent the standard deviation.

## 6 Simulation

We consider two setups:  $(K, p, T) = (2, 200, 500)$  and  $(K, p, T) = (10, 200, 1000)$ . For each setup, we consider a covariance matrix  $\Sigma^{(i)} = c^{(i)} \bar{\Sigma}$  where  $c^{(i)} \sim \text{Uni}([0.5, 1.5])$  and a base covariance  $\bar{\Sigma}$  for each  $i \in [K]$ , which represents a heterogeneous covariance among the arms. The base covariance  $\bar{\Sigma}$  follows the following configurations: DGP 1:  $\bar{\Sigma} = \text{diag}(\lambda_1, \dots, \lambda_p), \lambda_k = k^{-0.5}$ , DGP 2:  $\bar{\Sigma} = \text{diag}(\lambda_1, \dots, \lambda_p), \lambda_k = \exp(-k) + T \exp(-T)/p$ , DGP 3:  $\bar{\Sigma} = \text{diag}(\lambda_1, \dots, \lambda_p), \lambda_k = k^{-1+1/T}$ , and DGP 4:  $\bar{\Sigma}_{i,j} = 0.3$  and  $\bar{\Sigma}_{i,i} = 0.7$  for  $j \neq i \in [p]$ . Note that the DGPs 1 and 3 correspond to Examples 2 and 1 in Proposition 1. DGP 3 is benign as well, while DGP 4 is not. We generate  $X^{(i)}(t)$  from a centered  $p$ -dimensional Gaussian with covariance  $\Sigma^{(i)}$ ,  $\theta^{(i)}$  from a standard normal distribution which yields non-sparse parameter vectors, and  $Y^{(i)}(t)$  by the linear model (1) with the noise with variance  $\sigma^2 = 0.01$ . We compare proposal (AEtC,  $C_T = 2$ ) to ESTC [Hao et al., 2020], LinUCB [Li et al., 2010, Abbasi-Yadkori et al., 2011], and DR Lasso Bandit [Kim and Paik, 2019].

Figure 2 illustrates the accumulated regret  $R(t)$  in relation to the round  $t \in [T]$ . In the first three benign DGPs, the AEtC consistently outperforms the other methods. In DGP 2, the advantage of AEtC is insignificant because the regret of any method is already small. This is because in DGP 2, a model with exponentially decaying behavior, only a small fraction of eigenvalues are important. However, AEtC performs significantly better than its competitors in DGP 1 and DGP 3, where the eigenvalues have a heavy-tail distribution. In a non-benign example of DGP 4, the proposed method is still comparable to LinUCB, which demonstrates the utility of an interpolating estimator.

## References

- Yasin Abbasi-Yadkori, Dávid Pál, and Csaba Szepesvári. Improved algorithms for linear stochastic bandits. *Advances in neural information processing systems*, 24, 2011. 1, 10, 13
- Naoki Abe and Philip M. Long. Associative reinforcement learning using linear probabilistic concepts. In *Proceedings of the Sixteenth International Conference on Machine Learning*, ICML, page 3–11. Morgan Kaufmann Publishers Inc., 1999. 1
- Deepak K. Agarwal, Bee-Chung Chen, Pradheep Elango, and Xuanhui Wang. Personalized click shaping through lagrangian duality for online recommendation. In *SIGIR '12*, 2012. 2
- Peter Auer, Nicolò Cesa-Bianchi, and Paul Fischer. Finite-time analysis of the multiarmed bandit problem. *Mach. Learn.*, 47(2-3):235–256, 2002. doi: 10.1023/A:1013689704352. 3
- Peter L Bartlett, Philip M Long, Gábor Lugosi, and Alexander Tsigler. Benign overfitting in linear regression. *Proceedings of the National Academy of Sciences*, 117(48):30063–30070, 2020. 2, 3, 4, 5, 6, 8, 13, 19
- Hamsa Bastani and Mohsen Bayati. Online decision making with high-dimensional covariates. *Oper. Res.*, 68(1):276–294, 2020. 1
- Denis Bosq. *Linear processes in function spaces: theory and applications*, volume 149. Springer Science & Business Media, 2000. 8, 19
- Bibhas Chakraborty and Susan A. Murphy. Dynamic treatment regimes. *Annual Review of Statistics and Its Application*, 1(1):447–464, 2014. 1
- Wei Chu, Lihong Li, Lev Reyzin, and Robert Schapire. Contextual bandits with linear payoff functions. In Geoffrey Gordon, David Dunson, and Miroslav Dudík, editors, *Proceedings of the Fourteenth International Conference on Artificial Intelligence and Statistics*, volume 15 of *Proceedings of Machine Learning Research*, pages 208–214. PMLR, 11–13 Apr 2011. 1
- Dylan J. Foster, Akshay Krishnamurthy, and Haipeng Luo. Model selection for contextual bandits. In *Advances in Neural Information Processing Systems 32*, pages 14714–14725, 2019. 13
- Botao Hao, Tor Lattimore, and Mengdi Wang. High-dimensional sparse linear bandits. *Advances in Neural Information Processing Systems*, 33:10753–10763, 2020. 1, 3, 10
- Satoshi Hara and Takanori Maehara. Enumerate lasso solutions for feature selection. In *Proceedings of the AAAI Conference on Artificial Intelligence*, volume 31, 2017. 2
- Kyoungseok Jang, Chicheng Zhang, and Kwang-Sung Jun. Popart: Efficient sparse regression and experimental design for optimal sparse linear bandits. In *NeurIPS*, 2022. 1
- Gi-Soo Kim and Myunghee Cho Paik. Doubly-robust lasso bandit. *Advances in Neural Information Processing Systems*, 32, 2019. 1, 10
- Vladimir Koltchinskii and Karim Lounici. Concentration inequalities and moment bounds for sample covariance operators. *Bernoulli*, 23(1):110–133, 2017. 2, 3, 8, 19
- T.L Lai and Herbert Robbins. Asymptotically efficient adaptive allocation rules. *Advances in Applied Mathematics*, 6(1):4–22, 1985. ISSN 0196-8858. 1, 3
- Lihong Li, Wei Chu, John Langford, and Robert E. Schapire. A contextual-bandit approach to personalized news article recommendation. In *Proceedings of the 19th International Conference on World Wide Web*, WWW '10, page 661–670. Association for Computing Machinery, 2010. 1, 10
- Wenjie Li, Adarsh Barik, and Jean Honorio. A simple unified framework for high dimensional bandit problems. In *International Conference on Machine Learning*, pages 12619–12655. PMLR, 2022. 1, 3
- Léo Miolane and Andrea Montanari. The distribution of the lasso: Uniform control over sparse balls and adaptive parameter tuning. *The Annals of Statistics*, 49(4):2313–2335, 2021. 2

- Shogo Nakakita and Masaaki Imaizumi. Benign overfitting in time series linear model with over-parameterization. *arXiv preprint arXiv:2204.08369*, 2022. [13](#)
- Min-hwan Oh, Garud Iyengar, and Assaf Zeevi. Sparsity-agnostic lasso bandit. In *International Conference on Machine Learning*, pages 8271–8280. PMLR, 2021. [1](#)
- Steffen Rendle. Factorization machines. In Geoffrey I. Webb, Bing Liu, Chengqi Zhang, Dimitrios Gunopulos, and Xindong Wu, editors, *ICDM 2010, The 10th IEEE International Conference on Data Mining, Sydney, Australia, 14-17 December 2010*, pages 995–1000. IEEE Computer Society, 2010. [2](#)
- Herbert Robbins. Some aspects of the sequential design of experiments. *Bulletin of the American Mathematical Society*, 58(5):527 – 535, 1952. [1](#)
- Liang Tang, Rómer Rosales, Ajit Singh, and Deepak Agarwal. Automatic ad format selection via contextual bandits. In *22nd ACM International Conference on Information and Knowledge Management, CIKM'13*, pages 1587–1594. ACM, 2013. [1](#)
- Alexander Tsigler and Peter L Bartlett. Benign overfitting in ridge regression. *arXiv preprint arXiv:2009.14286*, 2020. [3](#), [4](#), [5](#), [6](#), [13](#), [14](#)
- Sara A Van De Geer and Peter Bühlmann. On the conditions used to prove oracle results for the lasso. *Electronic Journal of Statistics*, 3:1360–1392, 2009. [2](#)
- Roman Vershynin. *High-dimensional probability: An introduction with applications in data science*, volume 47. Cambridge university press, 2018. [5](#)
- Xue Wang, Mingcheng Wei, and Tao Yao. Minimax concave penalized multi-armed bandit model with high-dimensional covariates. In *International Conference on Machine Learning*, pages 5200–5208. PMLR, 2018. [1](#)
- Yuyan Wang, Long Tao, and Xian Xing Zhang. Recommending for a multi-sided marketplace with heterogeneous contents. In *Proceedings of the 16th ACM Conference on Recommender Systems, RecSys '22*, page 456–459. Association for Computing Machinery, 2022. [1](#), [2](#)

## A Limitations

The following characterizes the limitations. We consider addressing these as interesting directions for future work.

- **More adaptive algorithms, such as ones based on upper confidence bounds:** This paper considers the class of the explore-then-commit methods. In many bandit problems, the upper confidence bound (UCB) method provides better empirical performance since it adaptively balances exploration and exploitation. Applying UCB to this problem is important future work. The key challenge here is that such an adaptive estimator involves a biased selection of the context vectors, which requires a more adaptive error bound for a high-dimensional linear model, such as the self-normalized bound [Abbasi-Yadkori et al., 2011].
- **Lower bound of the problem:** While we showed the optimal choice of  $T_0$  by deriving a matching bound, this does not exclude the possibility of a more adaptive bandit algorithm (e.g., UCB) that achieves a better rate of regret. Explicit construction of the lower bound requires two different models where the probability of an accurate (low-regret) estimate in one model implies a misestimation in the other model. To our knowledge, such a process for our non-sparse high-dimensional model is challenging because, unlike the sparse bandit model where only a small amount of parameters are active, in the non-sparse regime, we need to devise two models where very large ( $p > n$ ) number of non-equal coefficients and need to bound the KL divergence between such a large multivariate Gaussians.
- **Temporal correlation:** This paper assumes temporal independence (i.e.,  $X^{(i)}(t), X_i(t')$  are independent between  $t \neq t'$ ). While such an assumption is popular, allowing the temporal correlation widens the application of the framework. For example, the click probability of online advertisements depends on the period of time. There are some recent results that are potentially applicable in non-sparse high-dimensional regime (e.g., Nakakita and Imaizumi [2022]).
- **Exponentially decaying models:** AEtC directly assumes the eigenvalue structure of the covariance matrix (in particular, Example 1 or Example 2 in Proposition 1). Exploring the inclusion of exponentially decaying eigenvalues, such as Example 4 in Theorem 31 of Bartlett et al. [2020], would be an intriguing avenue to explore.
- **Nested models:** Foster et al. [2019] considered the contextual bandit problem under the nested model and introduced an algorithm that can adapt to the problem’s complexity. Considering such a nested model should be interesting.

## B Comparison with Sparse Bandits

Similar to our setting, sparse linear bandit models accept a very large number of features<sup>10</sup>. Sparse bandit algorithms employ the  $\ell_1$  regularizer to suppress most coefficients. The regret of a sparse bandit algorithm is characterized by the number of non-zero features  $s$ . In our case,  $s$  corresponds to  $p$  since all dimensions exhibit non-zero values. Consequently, regret bounds in sparse bandit translate into  $O(T)$  trivial bounds within our framework. We consider the sparse and benign overfitting to be orthogonal. There are numerous examples that are benign yet not sparse, and conversely, sparse but not benign. The primary incentive for benign overfitting theory is to illuminate the learnability of recent large-scale models. To rephrase, we are examining different problem classes in which we can ensure sublinear regret bounds, irrespective of any assumptions about sparsity.

## C Proofs on Risk Bounds

We give proofs on the upper bound in Theorem 2. The bound is derived from the risk bound in Tsigler and Bartlett [2020] and adapted for our setting. A significant difference here is that the budget  $T$ , which characterizes the covariance matrices  $\Sigma^{(i)}$ , and the sample size  $N$  used for estimation have different values.

We give some additional notation. For a vector  $b \in \mathbb{R}^p$  and  $q \in [p]$ , let  $b_{0:q} := (b_1, b_2, \dots, b_q)$  is a sub-vector. Similarly,  $b_{q:\infty} := (b_{q+1}, b_{q+2}, \dots, b_p)$  is a sub-vector with the rest of the terms.

---

<sup>10</sup>Typically, the number of feature  $p$  can be exponential to the number of datapoints  $T$ .

For a covariance matrix  $\Sigma \in \mathbb{R}^{p \times p}$  with eigenvalues  $\lambda_1, \dots, \lambda_p$ ,  $\Sigma_{0:q} = \text{diag}(\lambda_1, \dots, \lambda_q)$  and  $\Sigma_{q:\infty} = \text{diag}(\lambda_{q+1}, \dots, \lambda_p)$  are diagonal matrices with the subset of eigenvalues. Similarly, for the data matrix  $\mathbf{X}^{(i)} \in \mathbb{R}^{N \times p}$ ,  $\mathbf{X}_{0:q}^{(i)}$  denotes a sub-matrix with the first  $q$  columns of  $\mathbf{X}^{(i)}$ , and  $\mathbf{X}_{q:\infty}^{(i)}$  denotes a sub-matrix with the rest of the columns  $\mathbf{X}^{(i)}$ .

*Proof of Theorem 2.* For each  $i \in [K]$ , we study the bound on the risk  $\|\widehat{\theta}^{(i)} - \theta^{(i)}\|_{\Sigma^{(i)}}^2$ . Using the fact that  $\mathbf{Y}^{(i)} = \mathbf{X}^{(i)}\theta^{(i)} + \Xi^{(i)}$  with  $\Xi^{(i)} = (\xi^{(i)}(1), \dots, \xi^{(i)}(N))^\top \in \mathbb{R}^N$  where  $\xi^{(i)}(t)$  is an i.i.d. copy of  $\xi^{(i)}(1)$ , we first decompose  $\widehat{\theta}^{(i)}$  as

$$\begin{aligned}\widehat{\theta}^{(i)} &= (\mathbf{X}^{(i)})^\top (\mathbf{X}^{(i)} (\mathbf{X}^{(i)})^\top)^{-1} \mathbf{Y}^{(i)} \\ &= (\mathbf{X}^{(i)})^\top (\mathbf{X}^{(i)} (\mathbf{X}^{(i)})^\top)^{-1} \mathbf{X}^{(i)} \theta^{(i)} + (\mathbf{X}^{(i)})^\top (\mathbf{X}^{(i)} (\mathbf{X}^{(i)})^\top)^{-1} \Xi^{(i)} \\ &=: \widetilde{\theta}^{(i)} + \check{\theta}^{(i)}.\end{aligned}$$

Using the decomposition, we decompose the total error as

$$\|\widetilde{\theta}^{(i)} + \check{\theta}^{(i)} - \theta^{(i)}\|_{\Sigma^{(i)}}^2 \leq 2\|\widetilde{\theta}^{(i)} - \theta^{(i)}\|_{\Sigma^{(i)}}^2 + 2\|\check{\theta}^{(i)}\|_{\Sigma^{(i)}}^2 =: 2T_B + 2T_V.$$

Here,  $T_B$  denotes a bias term of the risk, and  $T_V$  denotes a variance term.

In the following, we develop a bound on each of the terms. Fix  $k \in [p]$ . By Corollary 6 in [Tsigler and Bartlett \[2020\]](#), we achieve the following bounds with some constant  $c > 0$ , which holds with the desired probability. Here, we set  $\mu_{n,k}(A_k^{-1})$  is the  $n$ -th largest eigenvalue of  $A_k^{-1}$  for  $n \in [N]$ .

$$T_B \leq c\|\theta_{k:\infty}^{(i)}\|_{\Sigma^{(i)}_{k:\infty}} + c\|\theta_{0:k}^{(i)}\|_{(\Sigma^{(i)})_{0:k}^{-1}} \left( \frac{\sum_{j>k} \lambda_j^{(i)}}{N} \right)^2, \text{ and} \quad (13)$$

$$T_V \leq c \frac{k}{N} + c \frac{N \sum_{j>k} (\lambda_j^{(i)})^2}{(\sum_{j>k} \lambda_j^{(i)})^2}. \quad (14)$$

Note that only the number of samples  $N$  appears explicitly in the boundary, while the budget  $T$  affects it only implicitly through  $\Sigma^{(i)}$ .

We study the bound for the bias part in (13). Here, we set  $k = k_N^*(\Sigma^{(i)}, N)$  using the coherent rank. By Hölder's inequality, we obtain

$$\begin{aligned}T_B &\leq \|\theta_{k_N^*:\infty}^{(i)}\|_{\Sigma^{(i)}_{k_N^*:\infty}}^2 + \|\theta_{0:k_N^*}^{(i)}\|_{\Sigma^{(i)}_{0:k_N^*}^{-1}}^2 \left( \frac{\sum_{j>k_N^*} \lambda_j^{(i)}}{N} \right)^2 \\ &\leq \|\theta^{(i)}\|^2 \left( \lambda_{k_N^*+1}^{(i)} + (\lambda_{k_N^*}^{(i)})^{-1} \left( \frac{\sum_{j>k_N^*} \lambda_j^{(i)}}{N} \right)^2 \right) \\ &= \|\theta^{(i)}\|^2 \left( \lambda_{k_N^*+1}^{(i)} + (\lambda_{k_N^*}^{(i)})^{-1} \left( \frac{\sum_{j \geq k_N^*} \lambda_j^{(i)} - \lambda_{k_N^*}^{(i)}}{N} \right)^2 \right) \\ &= \|\theta^{(i)}\|^2 \left( \lambda_{k_N^*+1}^{(i)} + (\lambda_{k_N^*}^{(i)})^{-1} (\lambda_{k_N^*}^{(i)})^2 \left( \frac{\sum_{j \geq k_N^*} \lambda_j^{(i)} - \lambda_{k_N^*}^{(i)}}{\lambda_{k_N^*}^{(i)} N} \right)^2 \right) \\ &= \|\theta^{(i)}\|^2 \left( \lambda_{k_N^*+1}^{(i)} + \lambda_{k_N^*}^{(i)} \left( \frac{r_{k_N^*-1}(\Sigma^{(i)}) - 1}{N} \right)^2 \right),\end{aligned}$$

which follows the definition of the effective rank  $r_k(\Sigma^{(i)})$ . We also apply the properties of the ranks and obtain

$$\|\theta^{(i)}\|^2 \left( \lambda_{k_N^*+1}^{(i)} + \lambda_{k_N^*}^{(i)} \left( \frac{r_{k_N^*-1}(\Sigma^{(i)}) - 1}{N} \right)^2 \right) \leq \|\theta^{(i)}\|^2 \left( \lambda_{k_N^*+1}^{(i)} + \lambda_{k_N^*}^{(i)} \left( \frac{N-1}{N} \right)^2 \right)$$

$$\begin{aligned}
&\leq \|\theta^{(i)}\|^2 \left( \lambda_{k_N^*+1}^{(i)} + \lambda_{k_N^*}^{(i)} \right) \\
&\leq c' \|\theta^{(i)}\|^2 \lambda_{k_N^*}^{(i)} \\
&\leq c' \|\theta^{(i)}\|^2 B_{N,T}^{(i)},
\end{aligned}$$

where  $c' := (1 + b^2)$  is a constant. The second last inequality follows  $\lambda_{k_N^*+1}^{(i)} \leq \lambda_{k_N^*}^{(i)}$ . About the variance term  $T_V$  in (14), we simply obtain  $T_V \leq V_{N,T}^{(i)}$  by their definitions.

Finally, we set  $C_U = \max\{c' \|\theta^{(i)}\|^2, c\}$  and obtain the statement.  $\square$

## D Proofs for EtC

### D.1 Concentration of the Maximum Value

**Lemma 10.** *Let  $Y_1, Y_2, \dots, Y_K$  be  $K$  sub-Gaussian random variables with common parameter  $\sigma$ . Let  $Y = \max_{i \in [K]} Y_i$  be the maximum of them<sup>11</sup>. Then, we have*

$$\mathbb{E}[Y] \leq \sigma \sqrt{2 \log K}. \quad (15)$$

*Proof of Lemma 10.* For any  $\lambda > 0$ , we have

$$e^{\lambda \mathbb{E}[\max_{i \in [K]} Y_i]} \leq \mathbb{E} \left[ e^{\lambda \max_{i \in [K]} Y_i} \right] \quad (\text{by Jensen's inequality}) \quad (16)$$

$$= \mathbb{E} \left[ \max_{i \in [K]} e^{\lambda Y_i} \right] \quad (17)$$

$$\leq \sum_i \mathbb{E}[e^{\lambda Y_i}] \leq N e^{\lambda^2 \sigma^2 / 2}, \quad (18)$$

and thus

$$\mathbb{E}[\max_{i \in [K]} Y_i] \leq \frac{\log N}{\lambda} + \frac{\lambda \sigma^2}{2},$$

and taking  $\lambda = \sqrt{2 \log N / \sigma^2}$  yields the result.  $\square$

### D.2 High-probability Confidence Bound

**Lemma 11.** *There exists  $C > 0$  such that, for any  $T_0 \geq CK \log T$ , with probability at least  $1 - O(T^{-1})$ , event*

$$\mathcal{A} = \bigcap_{i \in [K]} \mathcal{A}_i \quad (19)$$

$$\mathcal{A}_i = \left\{ \|\widehat{\theta}^{(i)} - \theta^{(i)}\|_{\Sigma^{(i)}} \leq C E(T_0/K, T) \right\}. \quad (20)$$

*holds. Moreover, under  $\mathcal{A}$ , we have*

$$\mathbb{E}[\langle X^{(i^*(t))}(t), \theta^{(i^*(t))} \rangle - \langle X^{(I(t))}(t), \theta^{(I(t))} \rangle] \leq 2C E(T_0/K, T) \sqrt{2 \log K} \quad (21)$$

*for each  $t = T_0 + 1, T_0 + 2, \dots, T$ .*

Note that, in EtC, we have uniform exploration over  $K$  arms, and thus  $N = T_0/K$ .

*Proof of Lemma 11.* Theorem 2 implies that for some  $C > 0$ , with probability at least  $1 - c_U e^{-(C \log T)/c_U} \geq 1 - 1/T$ ,  $\mathcal{A}_i$  holds. Moreover, the union bound of this over  $K$  arms implies  $\mathcal{A}$  holds with probability  $1 - K/T$ .

Using the definition of the optimal arm  $i^*(t) = \operatorname{argmax}_{i^*} \langle X_{i^*}(t), \theta_{i^*} \rangle$ , we have

$$\langle X^{(i^*(t))}(t), \theta^{(i^*(t))} \rangle - \langle X^{(I(t))}(t), \theta^{(I(t))} \rangle$$

<sup>11</sup>These random variables can be dependent each other.

$$\begin{aligned}
&\leq \langle X^{(i^*(t))}(t), \widehat{\theta}_{i^*(t)} \rangle - \langle X^{(I(t))}(t), \widehat{\theta}_{I(t)} \rangle + 2D_{I(t)}(t) \\
&\leq 2D_{I(t)}(t) \quad (\text{by definition of } I(t)) \\
&= 2 \max_{i \in [K]} D_i(t),
\end{aligned}$$

where  $\Delta_i = \theta^{(i)} - \widehat{\theta}^{(i)}$  and  $D_i(t) = \langle X_i(t), \Delta_i \rangle$ . Given  $\Delta_i$  at the end of round  $T_0$ ,  $D_i(t)$  for each  $i$  is a sub-Gaussian random variable. Under the event  $\mathcal{A}$ , the variance of  $D_i(t)$  is bounded as

$$\mathbb{E}[|D_i(t)|] \leq C \mathbb{E}(T_0/K, T). \quad (22)$$

By using this and Lemma 10 on the maximum of  $K$  sub-Gaussian random variables, we have,

$$2\mathbb{E}[|D(t)|] = 2\mathbb{E}[|\max_i D_i(t)|] \quad (23)$$

$$\leq 2C \mathbb{E}(T_0/K, T) \sqrt{2 \log K}. \quad (\text{by Lemma 10}) \quad (24)$$

□

### D.3 Proof of Theorem 4

By using Lemma 11, we derive the regret upper bound of Theorem 4.

*Proof of Theorem 4.* The regret (Eq. (2)) is bounded as

$$\begin{aligned}
R(T) &= \mathbb{E} \left[ \sum_{t=1}^T \langle X^{(i^*(t))}(t), \theta^{(i^*(t))} \rangle - \langle X^{(I(t))}(t), \theta^{(I(t))} \rangle \right] \\
&= \sum_{t=1}^{T_0} \mathbb{E}[\langle X^{(i^*(t))}(t), \theta^{(i^*(t))} \rangle - \langle X^{(I(t))}(t), \theta^{(I(t))} \rangle] \\
&\quad + \sum_{t=T_0+1}^T \mathbb{E}[\langle X^{(i^*(t))}(t), \theta^{(i^*(t))} \rangle - \langle X^{(I(t))}(t), \theta^{(I(t))} \rangle], \\
&=: R_1 + R_2.
\end{aligned}$$

We bound the first term  $R_1$  as

$$\begin{aligned}
R_1 &\leq \sum_{t=1}^{T_0} 2\mathbb{E} \left[ \max_{i \in [K]} \langle X^{(i)}(t), \theta^{(i)} \rangle \right] \\
&\leq \sum_{t=1}^{T_0} 2\kappa_x \sqrt{2 \log K} \theta_{\max} \\
&\quad (\text{by Assumption 1 and Lemma 10}) \\
&= T_0 \times 2\kappa_x \theta_{\max} \sqrt{2 \log K} = \widetilde{O}(T_0).
\end{aligned}$$

We bound the second term  $R_2$  as

$$\begin{aligned}
R_2 &\leq \sum_{t=T_0+1}^T \mathbb{E} \left[ \mathbf{1}\{\mathcal{A}\} 2C \mathbb{E}(T_0/K, T) \sqrt{2 \log K} + \mathbf{1}\{\mathcal{A}^c\} (\langle X^{(i^*(t))}(t), \theta^{(i^*(t))} \rangle - \langle X^{(I(t))}(t), \theta^{(I(t))} \rangle) \right] \\
&\quad (\text{by Eq. (21)}) \\
&\leq \sum_{t=T_0+1}^T \mathbb{P}(\mathcal{A}) 2C \mathbb{E}(T_0/K, T) \sqrt{2 \log K} + \mathbb{P}(\mathcal{A}^c) \times 2\kappa_x \theta_{\max} \sqrt{2 \log K} \\
&\quad (\text{by the same discussion as } R_1) \\
&\leq 2TC \mathbb{E}(T_0/K, T) \sqrt{2 \log K} + \widetilde{O}(T) \mathbb{P}(\mathcal{A}^c) \\
&\quad (\text{by Lemma 11})
\end{aligned}$$



$$\leq 2TC \mathbb{E}(T_0/K, T) \sqrt{2 \log K} + \tilde{O}(T) \times \frac{K}{T}.$$

Combining these bounds, we obtain

$$R(T) = R_1 + R_2 \leq \tilde{O}(T_0) + \tilde{O}(T \mathbb{E}(T_0/K, T)).$$

This bound is optimized by choosing  $T_0$  in accordance with Eq. (7), and then we have the theorem.  $\square$

#### D.4 Proof of Theorem 5

This section provides the regret lower bound of EtC.

*Proof of Theorem 5.* We consider a model with  $K = 3$ . Let  $\epsilon_T = \mathbb{E}(T_0/K, T)$ . We explicitly construct  $\Sigma^{(i)}$  as follows: First,  $\Sigma^{(1)}, \Sigma^{(2)}, \Sigma^{(3)}$  are identical and benign, and denote  $k$ -th eigenvalue as  $\lambda_k^{(i)} = \lambda_k$ . The coefficient  $\theta^{(1)} = (1, 0, 0, \dots)^\top$ ,  $\theta^{(2)} = (\epsilon_T, 0, 0, \dots)^\top$ , and  $\theta^{(3)} = (0, 0, 0, \dots)^\top$ . With these  $\{\theta^{(i)}\}_{i=1,2,3}$ , the only non-zero coefficients are  $\theta_1^{(1)}, \theta_1^{(2)}$ , and thus the best arm is defined in terms of  $X_1^{(1)}(t), X_1^{(2)}(t)$ , which are the first components of  $X^{(1)}(t), X^{(2)}(t)$ , respectively.

Let  $R_1, R_2$  be regret during the exploration and exploitation phases, respectively.

##### Regret during the exploration phase:

We first bound the regret during the exploration phase where we draw an arm uniformly randomly. In the following, we show that the regret per round is  $\Omega(1)$ . Since  $X^{(i)}(t)$  is a zero-mean ( $p$ -dimensional) Gaussian, its linear function such as  $\langle X^{(i)}(t), \theta^{(i)} \rangle$  are  $\langle X^{(i)}(t), \hat{\theta}^{(i)} \rangle$  are zero-mean univariate Gaussians given  $\theta^{(i)}, \hat{\theta}^{(i)}$ . Therefore,

$$r_{ij}(t) := \langle X^{(i)}(t), \theta^{(i)} \rangle - \langle X^{(j)}(t), \theta^{(j)} \rangle$$

is also a Gaussian, and its variance is  $\Theta(1)$ . Therefore,  $\mathbb{P}[r_{12}(t) \geq 1], \mathbb{P}[r_{13}(t) \geq 1] = \Theta(1)$ . The regret in the rounds we draw arm 2, 3 is at least  $\mathbf{1}[r_{12}(t) \geq 1]r_{12}(t), \mathbf{1}[r_{13}(t) \geq 1]r_{13}(t) = \Theta(1)$ , which implies the regret-per-round is  $\Omega(1)$ .

In summary,  $\mathbb{E}[R_1] = \Omega(1) \times T_0 = \Omega(T_0)$ .

##### Regret during the exploitation phase:

We then bound the regret during the exploitation phase. Intuitively speaking, an algorithm misidentifies the better arm among 2 and 3 with  $\Omega(1)$  probability and the regret per such a misidentification is  $\Omega(\epsilon_T)$ .

Theorems 2 and Lemma 3 state that there exists a constant  $c > 0$  such that probability at least  $1 - ce^{-N/c}$ , for all  $i$  we have

$$\mathbb{E} \left[ \|\hat{\theta}^{(i)} - \theta^{(i)}\|_{\Sigma^{(i)}} \right] \in (C^L \epsilon_T, C^U \epsilon_T) \quad (25)$$

for some constants  $C^L, C^U > 0$ .

Without loss of generality, we assume  $N$  to be sufficiently large such that  $1 - ce^{-N/c} > 1/2$  because if  $N = O(\log T)$  then the size of the error bound is at least polylogarithmic, which results in regret of  $\tilde{\Omega}(T)$ . In the following, we assume Eq. (25) is the case, and we show that the regret-per-round is  $\Omega(\epsilon_T)$ . We define the events as follows:

$$\mathcal{G}(t) := \{X_1^{(2)}(t) \in [1, 2]\} \quad (26)$$

$$\mathcal{H}(t) := \{\langle X_1^{(1)}(t), \hat{\theta}^{(1)} \rangle < \langle X_1^{(2)}(t), \hat{\theta}^{(2)} \rangle < \langle X_1^{(3)}(t), \hat{\theta}^{(3)} \rangle\}. \quad (27)$$

Event  $\mathcal{G}(t)$  states that arm 2 is positive and not very large, Event  $\mathcal{H}(t)$  states that the algorithm draws considers the arm 3 is the best and arm 2 is the second best.

If  $\mathcal{G}(t) \cap \mathcal{H}(t)$  is the case, then arm 3 is chosen but suboptimal, and the regret is at least

$$\langle X_1^{(2)}(t), \theta_1^{(2)} \rangle - \langle X_1^{(3)}(t), \theta_1^{(3)} \rangle \in [\epsilon_T, 2\epsilon_T], \quad (28)$$

where we used  $\mathcal{G}(t), \langle X^{(2)}(t), \theta^{(2)} \rangle = X_1^{(2)}(t)\epsilon_T$ , and  $\langle X^{(3)}(t), \theta^{(3)} \rangle = 0$ . Therefore, showing

$$\mathbb{P}[\mathcal{G}(t) \cap \mathcal{H}(t)] = \Omega(1) \quad (29)$$

suffices to show that regret-per-round is  $\Omega(\epsilon_T)$ . First,  $X_{2,1}(t)$  is a Gaussian with scale  $\Theta(1)$ , which implies  $\mathcal{G}$  occurs with probability  $\Theta(1)$ . Second, conditioned on  $\mathcal{G}(t)$ , the sufficient condition for  $\mathcal{H}(t)$  is

$$\mathcal{H}'(t) := \{\langle X^{(1)}(t), \widehat{\theta}^{(1)} \rangle < 0, \langle X^{(3)}(t), \widehat{\theta}^{(3)} \rangle > 0, \langle X^{(3)}(t), \widehat{\theta}^{(3)} \rangle - \langle X_{2,\setminus 1}^{(2)}(t), \widehat{\theta}_{\setminus 1}^{(2)} \rangle \geq 2\epsilon_T\}, \quad (30)$$

where

$$\langle X_{2,\setminus 1}^{(2)}(t), \widehat{\theta}_{\setminus 1}^{(2)} \rangle := \langle X^{(2)}(t), \widehat{\theta}^{(2)} \rangle - X_1^{(2)}(t) \widehat{\theta}_1^{(2)},$$

is an inner product that ignores the first component. Here, under Eq. (25), each of  $i \in [3]$ ,  $\langle X^{(i)}(t), \widehat{\theta}^{(i)} \rangle$ , and  $\langle X_{2,\setminus 1}^{(2)}(t), \widehat{\theta}_{\setminus 1}^{(2)} \rangle$ , is a Gaussian random variables with its standard deviation  $\Omega(\epsilon_T)$ . By this fact it is clear that  $\mathbb{P}[\mathcal{H}'(t)] = \Omega(1)$ . Therefore,  $\mathbb{P}[\mathcal{H}'(t)|\mathcal{G}(t)] = \Omega(1)$ . In summary,  $\mathcal{G}(t) \cap \mathcal{H}(t) \supset \mathcal{G}(t) \cap \mathcal{H}'(t)$  occurs with probability  $\Omega(1)$ , and thus regret-per-round is  $\Omega(\epsilon_T)$  by Eq. (28).

In summary,  $\mathbb{E}[R_2] \geq \Omega(\epsilon_T) \times T$ , and the expected regret is bounded as

$$R(T) = \mathbb{E}[R_1] + \mathbb{E}[R_2] \quad (31)$$

$$= \Omega(T_0) + \Omega(\epsilon_T)T, \quad (32)$$

which completes the proof.  $\square$

## E Proofs for AEtC

### E.1 Proof of Lemma 6

We have

$$|\text{tr}(\Sigma^{(i)}) - \text{tr}(\widehat{\Sigma}^{(i)})| \quad (33)$$

$$= \log(T) \times O\left(\sqrt{\sum_j \lambda_j^2}\right) \quad (34)$$

(by Lemma 12 with  $\eta = O(\log(T))$ , transformation above follows with probability  $\text{poly}(T^{-1})$ ) (35)

$$= \begin{cases} \widetilde{O}(1) & \text{(Example 1, where we used } \sum_j (j^{-(1+)})^2 = O(1)\text{),} \\ \widetilde{O}(T^{c(1-2b)/2}) & \text{(Example 2, where we used } \sum_{j=1}^{T^c} (j^{-b})^2 = [T^c]^{1-2b}\text{),} \end{cases} \quad (36)$$

$$= o\left(\text{tr}(\Sigma^{(i)})\right),$$

(by  $\text{tr}(\Sigma^{(i)}) = O(T^a)$  (Example 1) or  $\text{tr}(\Sigma^{(i)}) = O(T^{c(1-b)})$  (Example 2)) (37)

from which Lemma 6 follows.

**Lemma 12.** *Suppose that Assumption 1 holds. Assume that  $\lambda_1, \sum_j \lambda_j < +\infty$ . Let the empirical covariance matrix with  $N$  samples be*

$$\widehat{\Sigma}^{(i)} := \frac{1}{N} (\mathbf{X}^{(i)})^\top \mathbf{X}^{(i)}. \quad (38)$$

Then, for any  $\eta > 1$ , with probability at least  $1 - 2e^{-\eta}$ , we have

$$|\text{tr}(\widehat{\Sigma}^{(i)}) - \text{tr}(\Sigma^{(i)})| \leq \frac{C\kappa_x^2 \max\left(\eta\lambda_1, \sqrt{\eta \sum_j \lambda_j^2}\right)}{N} \leq C\kappa_x^2 \eta \sqrt{\sum_j \lambda_j^2}$$

for some constant  $C > 0$ .

*Proof of Lemma 12.* We have

$$\text{tr}(\widehat{\Sigma}^{(i)}) = \frac{1}{N} \text{tr}\left((\mathbf{X}^{(i)})^\top \mathbf{X}^{(i)}\right) \quad (39)$$

$$= \frac{1}{N} \text{tr} \left( V^{(i)} (\Lambda^{(i)})^{1/2} (\mathbf{Z}^{(i)})^\top \mathbf{Z}^{(i)} (\Lambda^{(i)})^{1/2} (V^{(i)})^\top \right) \quad (40)$$

$$= \frac{1}{N} \text{tr} \left( (\Lambda^{(i)})^{1/2} (V^{(i)})^\top V^{(i)} (\Lambda^{(i)})^{1/2} (\mathbf{Z}^{(i)})^\top \mathbf{Z}^{(i)} \right) \quad (41)$$

$$= \frac{1}{N} \text{tr} \left( \Lambda^{(i)} (\mathbf{Z}^{(i)})^\top \mathbf{Z}^{(i)} \right), \quad (42)$$

and thus

$$\text{tr}(\widehat{\Sigma}^{(i)}) - \text{tr}(\Sigma^{(i)}) = \frac{1}{N} \text{tr} \left( \Lambda^{(i)} \left( (\mathbf{Z}^{(i)})^\top \mathbf{Z}^{(i)} - I_p \right) \right). \quad (43)$$

Each diagonal element of  $(\mathbf{Z}^{(i)})^\top \mathbf{Z}^{(i)} - I_p$  is a sum of  $N$  independent samples, and each sample is zero-mean  $\kappa_x^2$  sub-exponential random variable. Using Lemma 12 in Bartlett et al. [2020], with probability at least  $1 - 2e^{-\eta}$ , we have

$$\left| \text{tr} \left( \Lambda^{(i)} \left( (\mathbf{Z}^{(i)})^\top \mathbf{Z}^{(i)} - I_p \right) \right) \right| \leq C \kappa_x^2 \max \left( \eta \lambda_1, \sqrt{\eta \sum_j \lambda_j^2} \right), \quad (44)$$

for some  $C > 0$ , which completes the proof.  $\square$

## E.2 Proof of Lemma 7

**Lemma 13.** (Lemma 4.2 in Bosq [2000]) *For any two matrices  $\mathbf{X}_0, \mathbf{X}_1$  with their eigenvalues  $(\lambda_{0,j})_{j \in [p]}$  and  $(\lambda_{1,j})_{j \in [p]}$ , we have*

$$|\lambda_{0,j} - \lambda_{1,j}| \leq \|\mathbf{X}_0 - \mathbf{X}_1\|_{\text{op}} \quad \forall j \in [p]. \quad (45)$$

**Lemma 14** (Corollary 2 in Koltchinskii and Lounici [2017]). *Suppose that  $X_1, \dots, X_N$  are  $\mathbb{R}^p$ -valued i.i.d. random vectors whose mean is zero and covariance is  $\Sigma$ .  $\widehat{\Sigma} = N^{-1} \sum_{i=1}^N X_i X_i^\top$  is an empirical covariance matrix. Then, there exists a constant  $C > 0$  and with probability  $1 - e^{-\eta}$  we have*

$$\|\widehat{\Sigma} - \Sigma\|_{\text{op}} \leq C \|\Sigma\|_{\text{op}} \sqrt{\frac{\widetilde{\mathbf{r}}(\Sigma) + \eta}{N}}, \quad (46)$$

where

$$\widetilde{\mathbf{r}}(\Sigma) := \frac{\text{tr}(\Sigma)}{\|\Sigma\|_{\text{op}}}.$$

*Proof of Lemma 7.* Lemmas 13 and 14 imply that

$$\max_j |\widehat{\lambda}_j - \lambda_j| \leq \|\widehat{\Sigma} - \Sigma\|_{\text{op}} = C \sqrt{\frac{\text{tr}(\Sigma^{(i)}) + \eta}{N}},$$

with probability  $1 - e^{-\eta}$ , and setting  $\eta = C_{\text{poly}} \log T$  yields the desired result.  $\square$

## E.3 Proof of Lemma 8

This section adopts the same set of assumptions as Lemma 8.

**Lemma 15.** *Let  $\tau$  be a constant that is independent of  $T$ . Then, for any  $C_{\text{poly}} > 0$ , with probability at least  $1 - T^{-C_{\text{poly}}}$ , we have*

$$|\beta_T - \widehat{\beta}_T| = O \left( \sqrt{\frac{\text{tr}(\Sigma^{(i)}) + C_{\text{poly}} \log T}{N}} \right). \quad (47)$$

*Proof of Lemma 15.* We assume Eq. (10) that holds with probability  $1 - T^{-C_{\text{poly}}}$ . We have,

$$\beta_T - \widehat{\beta}_T := \frac{1}{\tau} \sum_{k=1}^{\tau} \frac{\left( \log(\lambda_k / \lambda_{k+1}) - \log(\widehat{\lambda}_k / \widehat{\lambda}_{k+1}) \right)}{\log((k+1)/k)} \quad (48)$$

$$= \frac{1}{\tau} \sum_{k=1}^{\tau} \frac{\left( \beta_T \log\left(\frac{k+1}{k}\right) - \log\left(\frac{(k+1)^{\beta_T}}{k^{\beta_T}} + C \sqrt{\frac{\text{tr}(\Sigma^{(i)}) + C_{\text{poly}} \log T}{N}}\right) \right)}{\log((k+1)/k)} \quad (49)$$

$$= O\left(\sqrt{\frac{\text{tr}(\Sigma^{(i)}) + C_{\text{poly}} \log T}{N}}\right), \quad (50)$$

where we have used  $\log(c+x) = \log(c) + \log(1+x/c) \approx \log(c) + \frac{x}{c} + o(x)$  in the last transformation.  $\square$

**Lemma 16.** For  $1 \leq k \leq N^{(i)}$  and any  $C_{\text{poly}} > 0$ , with probability at least  $1 - T^{-C_{\text{poly}}}$ , we have

$$\log\left(\frac{\widehat{r}_k(\Sigma^{(i)})}{r_k(\Sigma^{(i)})}\right) = \log(T^{o(1)}).$$

Moreover, we have

$$\log\left(\frac{\widehat{k}_n}{k_n^*}\right) = \log(T^{o(1)})$$

for any  $i \in [K]$ ,  $n \in [N^{(i)}]$ .

*Proof of Lemma 16.* We first show the first  $k$  eigenvalues are negligible for  $k = O(T)$ : Namely,

$$\frac{\sum_{j < k} \lambda_j^{(i)}}{\text{tr}(\Sigma^{(i)})} = \begin{cases} O\left(\frac{T^a(k^{1/T^a} - 1)}{T^a}\right) & \text{(Example 1),} \\ O\left(\frac{k^{1-b}}{T^{c(1-b)}}\right) & \text{(Example 2),} \end{cases} = o(1). \quad (51)$$

Moreover, we have

$$\log\left(\frac{\widehat{r}_k(\Sigma^{(i)})}{r_k(\Sigma^{(i)})}\right) = \log\left(\left(\frac{\text{tr}(\widehat{\Sigma}^{(i)})}{\sum_{j > k} \lambda_j^{(i)}}\right) \cdot \left(\frac{\lambda_{k+1}^{(i)}}{\widehat{\lambda}_{k+1}^{(i)}}\right)\right) \quad (52)$$

$$= \log\left(\left(\frac{\text{tr}(\widehat{\Sigma}^{(i)})}{\text{tr}(\Sigma^{(i)})}\right) \cdot \left(\frac{\lambda_{k+1}^{(i)}}{\widehat{\lambda}_{k+1}^{(i)}}\right)\right) + o(1) \quad \text{(by Eq. (51))} \quad (53)$$

$$= \log\left(\left(\frac{\text{tr}(\widehat{\Sigma}^{(i)})}{\text{tr}(\Sigma^{(i)})}\right) \cdot \left(\frac{(k+1)^{-\beta_T}}{(k+1)^{-\widehat{\beta}_T}}\right)\right) + o(1) \quad (54)$$

$$= \log\left(\left(\frac{\text{tr}(\Sigma^{(i)})}{\text{tr}(\Sigma^{(i)})}\right) \cdot \left(\frac{(k+1)^{-\beta_T}}{(k+1)^{-\widehat{\beta}_T}}\right)\right) + o(1) \quad \text{(by Lemma 6)} \quad (55)$$

$$= \log\left(\left(\frac{\text{tr}(\Sigma^{(i)})}{\text{tr}(\Sigma^{(i)})}\right) \cdot \left(\frac{(k+1)^{-\beta_T}}{(k+1)^{-\beta_T}}\right)\right) + \log(T^{o(1)}) + o(1) \quad \text{(by } k+1 = O(T) \text{ and Lemma 15)} \quad (56)$$

$$= \log(T^{o(1)}). \quad (57)$$

By definition,

$$k^* = \min\{k \geq 0 \mid r_k(\Sigma^{(i)}) \geq N\} \quad (58)$$

$$\widehat{k}_N = \min\{k \geq 0 \mid \widehat{r}_k(\Sigma^{(i)}) \geq N\}. \quad (59)$$

Eq. (57) states that  $r_k(\Sigma^{(i)})/\widehat{r}_k(\Sigma^{(i)}) = T^{o(1)}$ , and by using the fact that  $\lambda_k^{(i)} = k^{-a}$  (Example 1) or  $\lambda_k^{(i)} = k^{-b}$  (Example 2), we have  $k^*/\widehat{k}_N = T^{o(1)}$ , which is equivalent to

$$\log\left(\frac{k^*}{\widehat{k}_N}\right) = \log(T^{o(1)}). \quad (60)$$

$\square$

**Lemma 17.** For any  $n \in [N]$ , with probability at least  $1 - T^{-C_{\text{poly}}}$ , we have

$$\log \left( \frac{\widehat{R}_{\widehat{k}_n}(\Sigma^{(i)})}{R_{k_n^*}(\Sigma^{(i)})} \right) = \log(T^{o(1)}).$$

*Proof of Lemma 17.* As same to the proof of Lemma 16, we use Lemma 7 and utilize  $|\widehat{\lambda}_j^{(i)} - \lambda_j^{(i)}| \leq C \sqrt{\frac{\text{tr}(\Sigma^{(i)}) + C_{\text{poly}} \log T}{N}}$  for every  $j = 1, \dots, p$ , which holds with probability  $1 - T^{-C_{\text{poly}}}$ . Eq. (60) implies that

$$\log \left( \frac{\widehat{R}_{\widehat{k}_n}(\Sigma^{(i)})}{\widehat{R}_{k_n^*}(\Sigma^{(i)})} \right) = T^{o(1)}.$$

Then, we study the ratio as

$$\begin{aligned} \log \left( \frac{\widehat{R}_{k_n^*}(\Sigma^{(i)})}{R_{k_n^*}(\Sigma^{(i)})} \right) &= \log \left( \left( \frac{\sum_{j>k_n^*} \lambda_j^{(i)}}{\text{tr}(\widehat{\Sigma}^{(i)})} \right)^2 \frac{\sum_{j>\widehat{k}_n} (\widetilde{\lambda}_j^{(i)})^2}{\sum_{j>k_n^*} (\lambda_j^{(i)})^2} \right) \\ &= \log \left( \left( \frac{\text{tr}(\Sigma^{(i)})}{\text{tr}(\widehat{\Sigma}^{(i)})} \right)^2 \frac{\sum_{j>\widehat{k}_n} (\widetilde{\lambda}_j^{(i)})^2}{\sum_{j>k_n^*} (\lambda_j^{(i)})^2} \right) + o(1) \quad (\text{by Eq. (51)}) \\ &= \log \left( \left( \frac{\text{tr}(\Sigma^{(i)})}{\text{tr}(\Sigma^{(i)})} \right)^2 \frac{\sum_{j>\widehat{k}_n} (\widetilde{\lambda}_j^{(i)})^2}{\sum_{j>k_n^*} (\lambda_j^{(i)})^2} \right) + o(1) \quad (\text{by Lemma 6}) \\ &= \log \left( \left( \frac{\text{tr}(\Sigma^{(i)})}{\text{tr}(\Sigma^{(i)})} \right)^2 \frac{\sum_{j>\widehat{k}_n} (\lambda_j^{(i)})^2}{\sum_{j>k_n^*} (\lambda_j^{(i)})^2} \right) + \log(T^{o(1)}) + o(1) \quad (\text{by Lemma 15}) \\ &= \log \left( \left( \frac{\text{tr}(\Sigma^{(i)})}{\text{tr}(\Sigma^{(i)})} \right)^2 \frac{\sum_{j>k_n^*} (\lambda_j^{(i)})^2}{\sum_{j>k_n^*} (\lambda_j^{(i)})^2} \right) + \log(T^{o(1)}) \quad (\text{by Eq. (60)}) \\ &= \log(T^{o(1)}). \end{aligned}$$

□

*Proof of Lemma 8.* The statement is straightforward from Lemmas 16 and 17. □
